# Supplementary material for: Association between systemic lupus erythematosus and pulmonary hypertension: Evidence from Meta-Analysis and Mendelian Randomization
Source: Research Square preprint supplement (doi:10.21203/rs.3.rs-2737104/v1), 2023-04-07

Supplementary Figure S1. Leave-one-out analysis, MR effect size, funnel plot and MR-Egger scatter plot for Systemic lupus erythematosus on Pulmonary Hypertension.

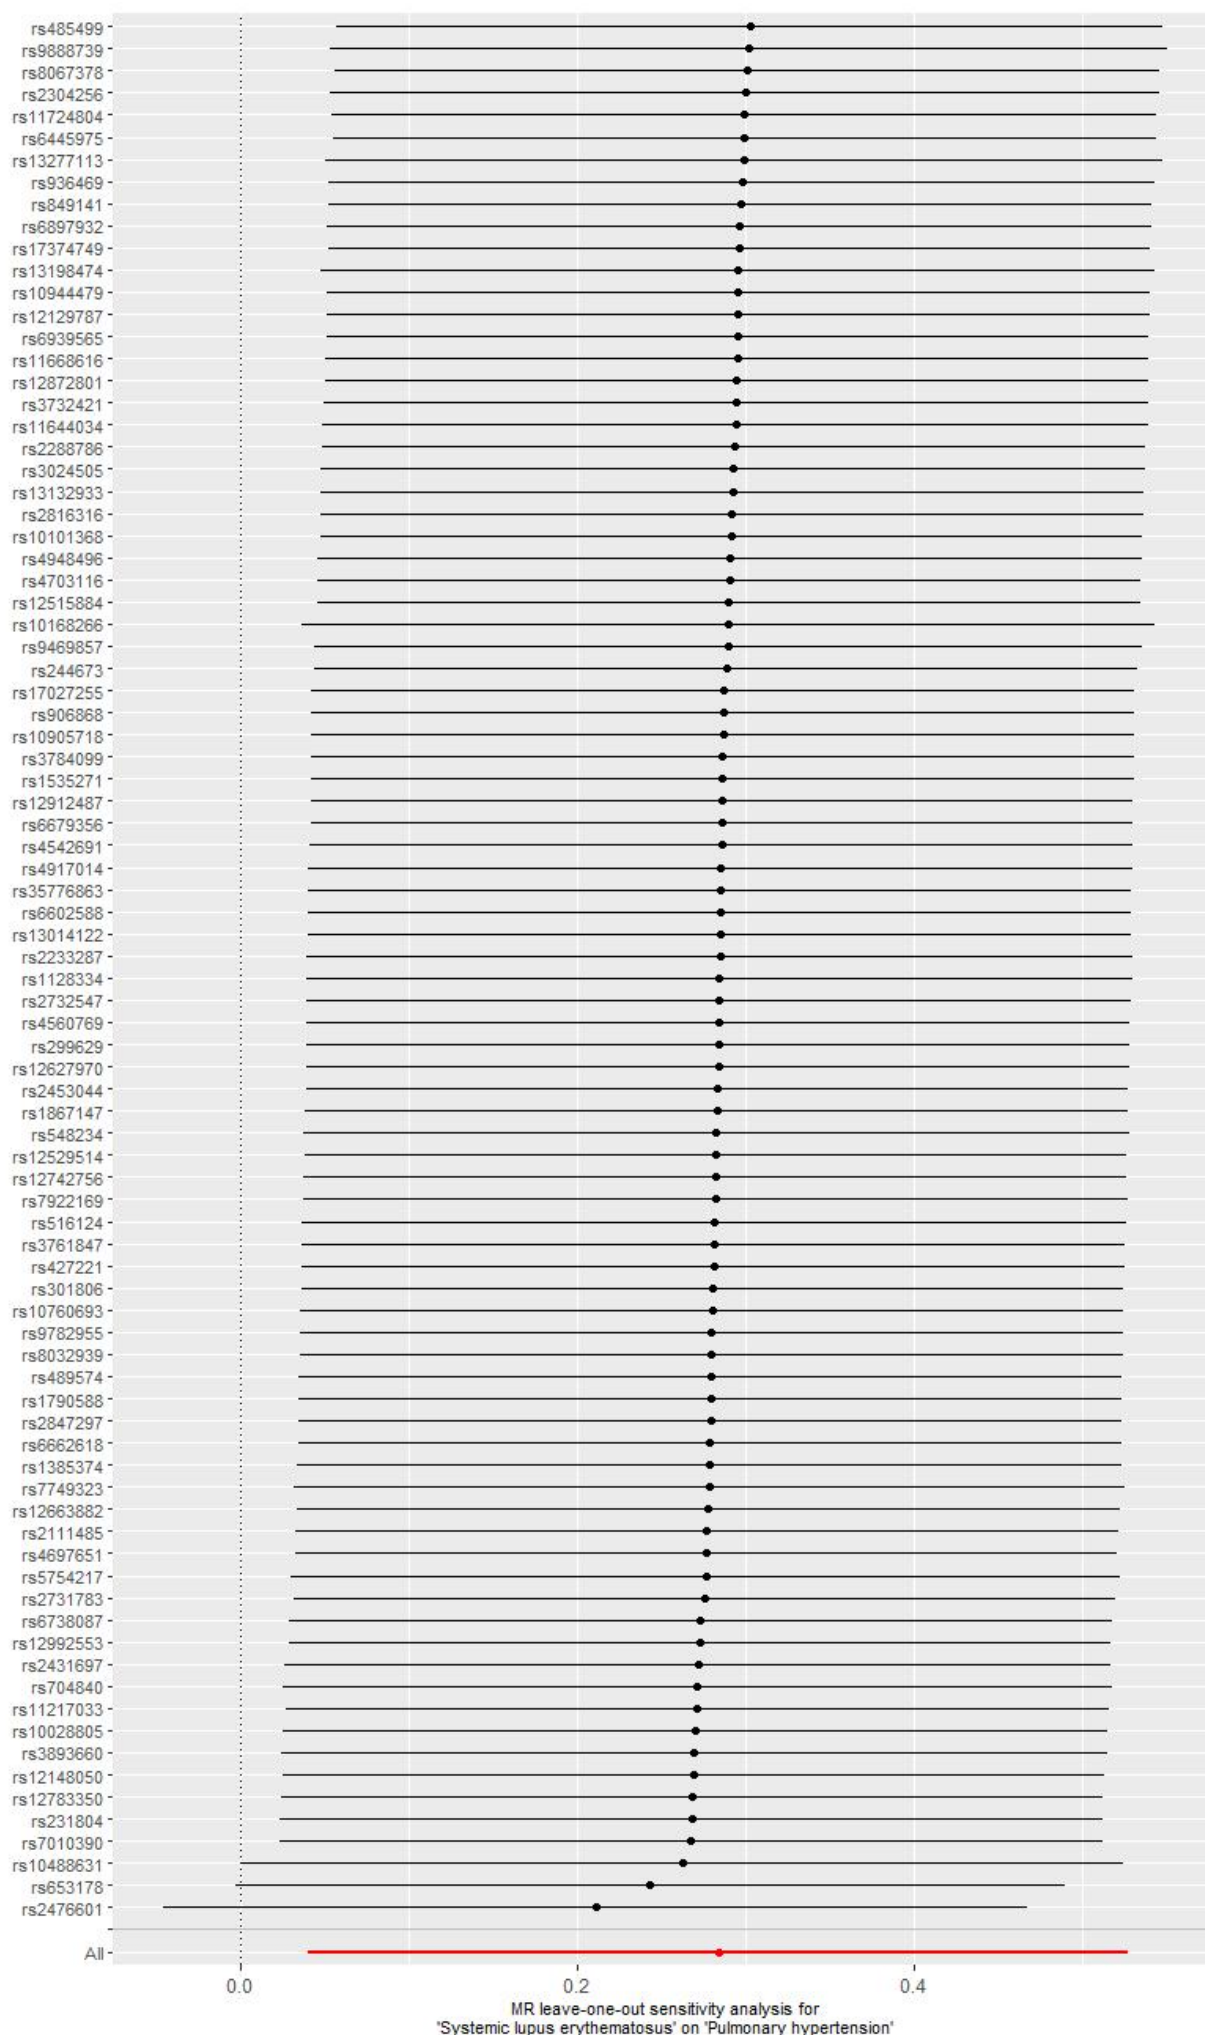

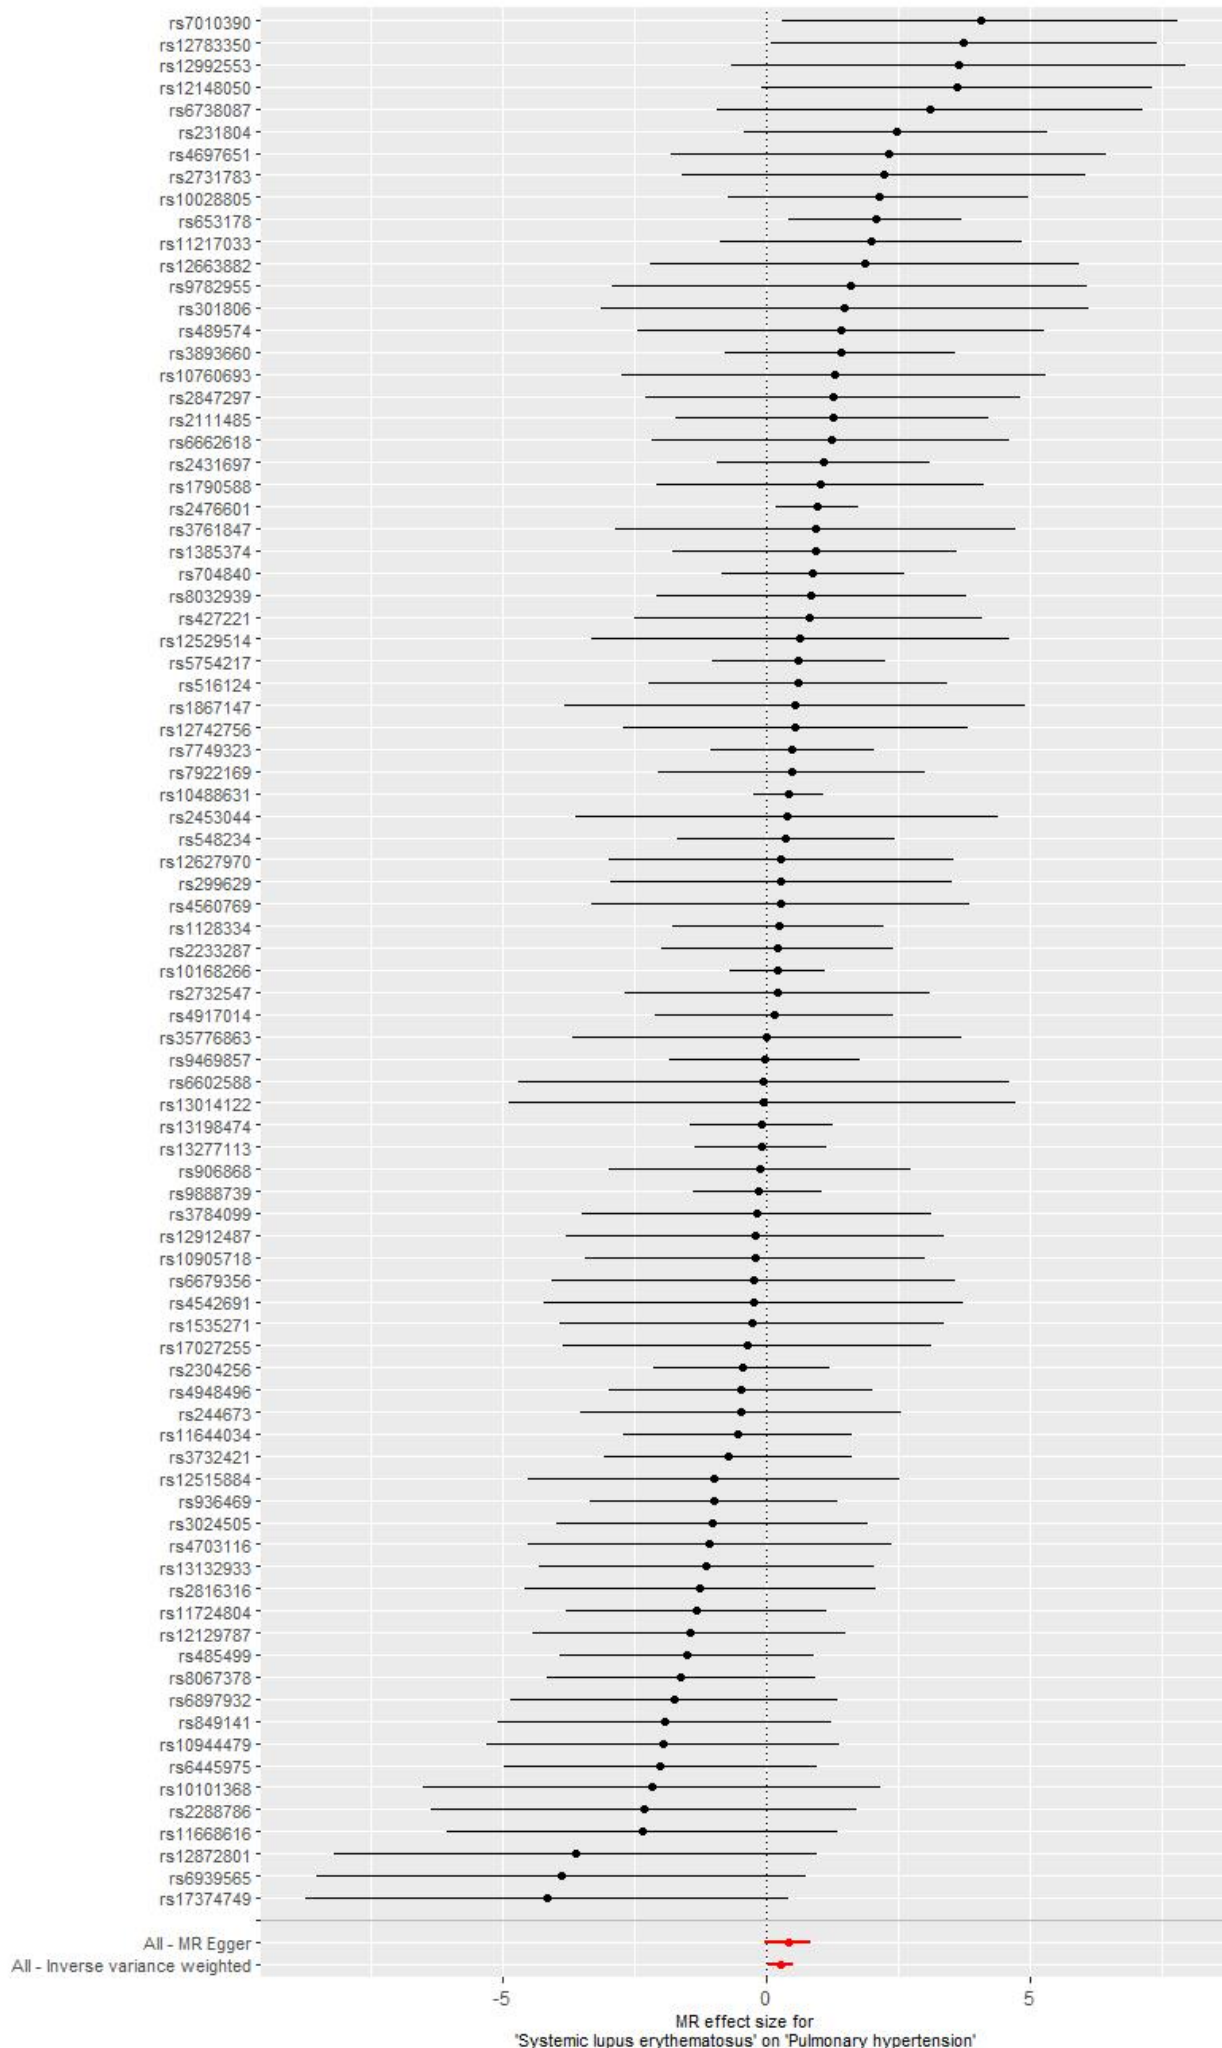

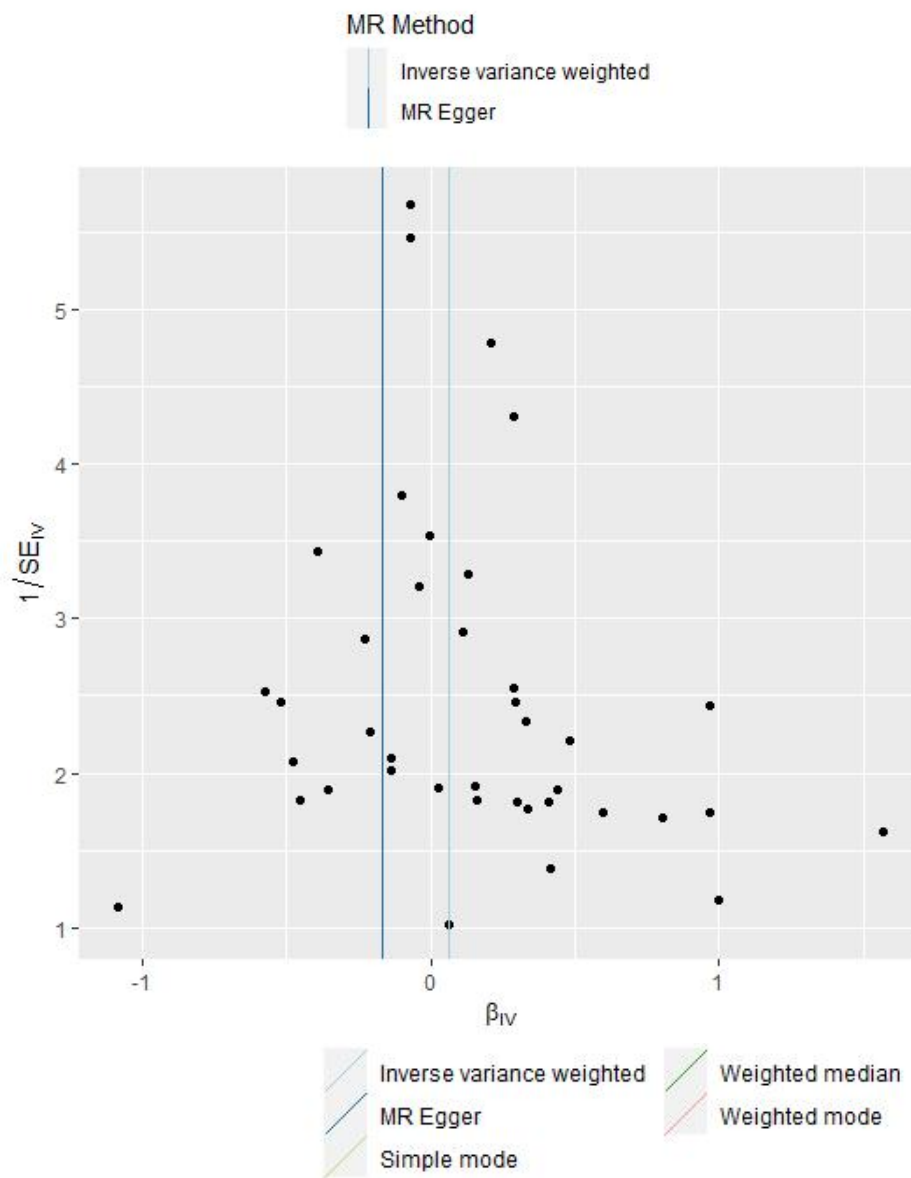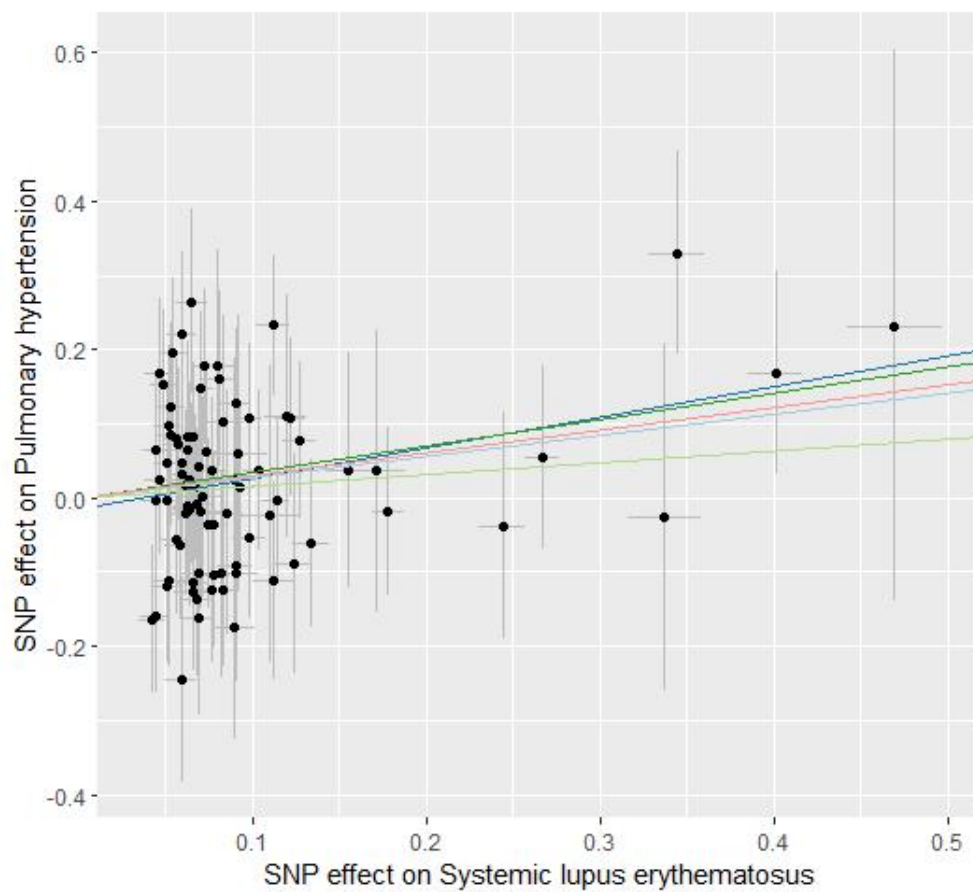

Supplementary Figure S2. Leave-one-out analysis, MR effect size, funnel plot and MR-Egger scatter plot for Systemic lupus erythematosus Replication group on Pulmonary Hypertension.

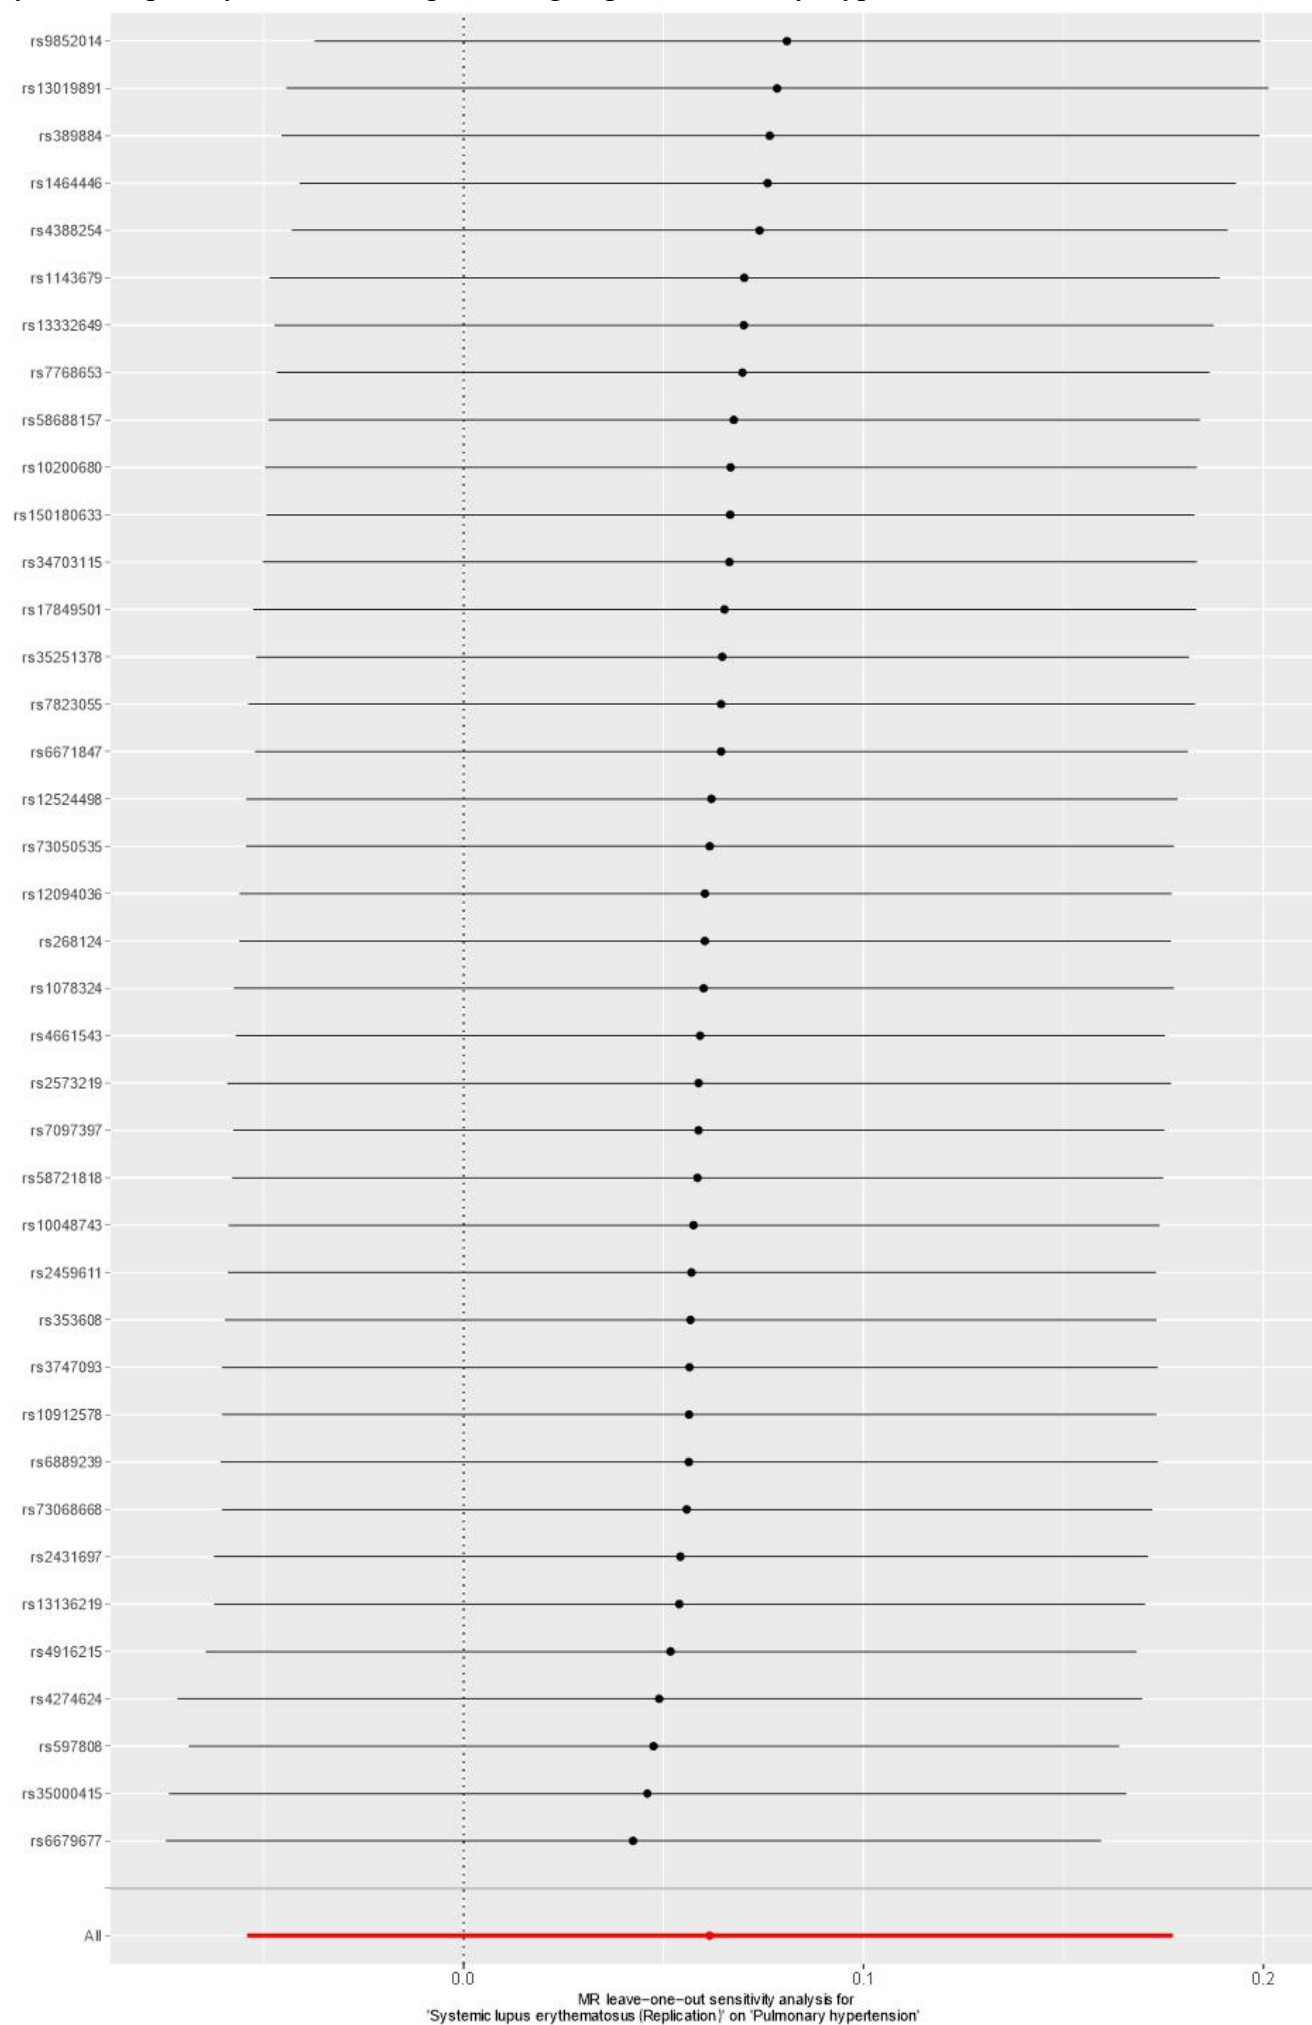

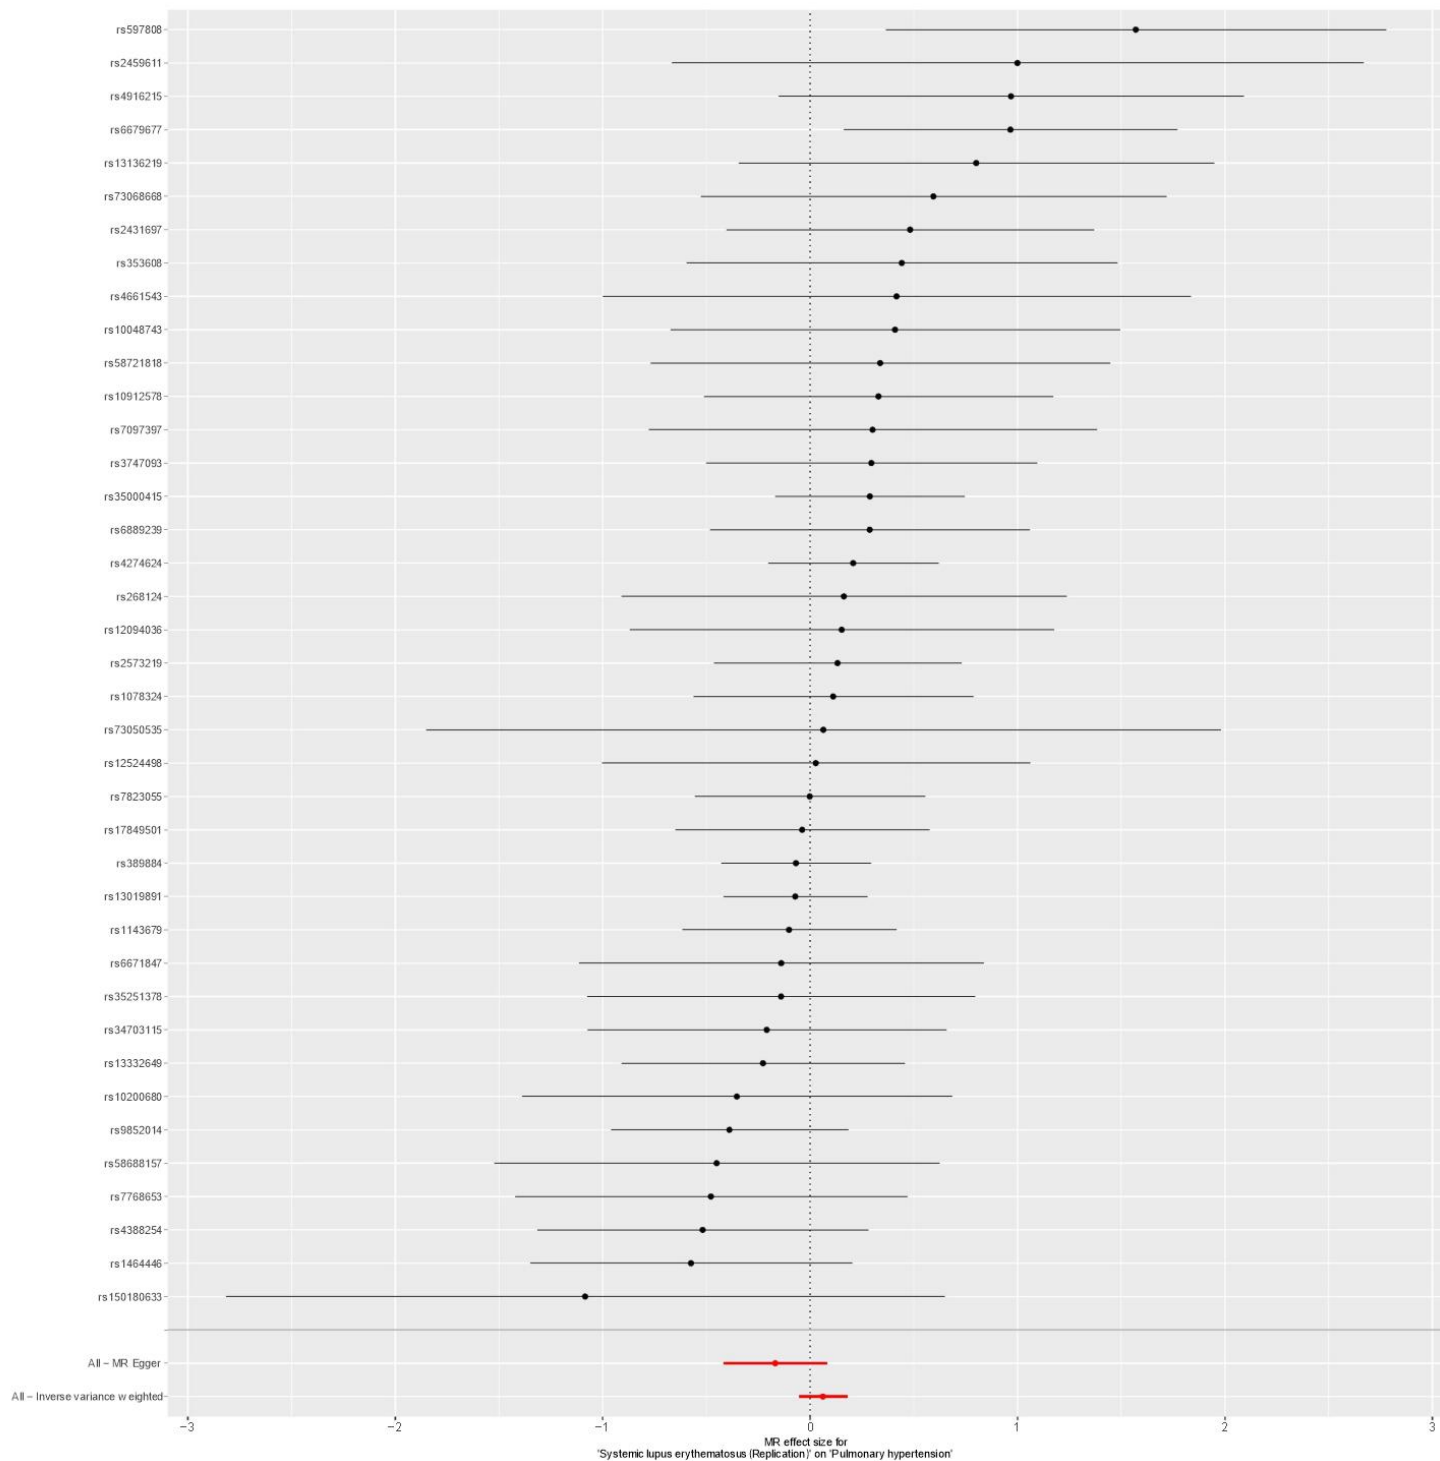

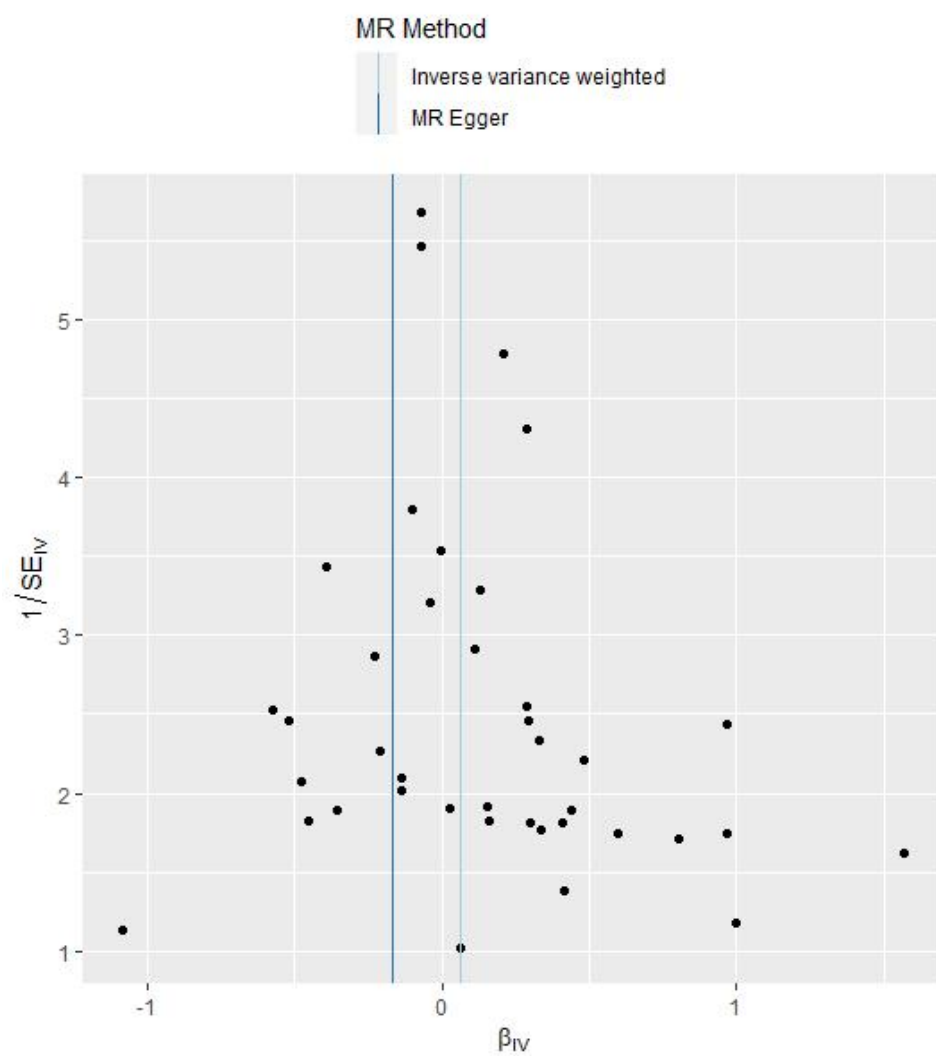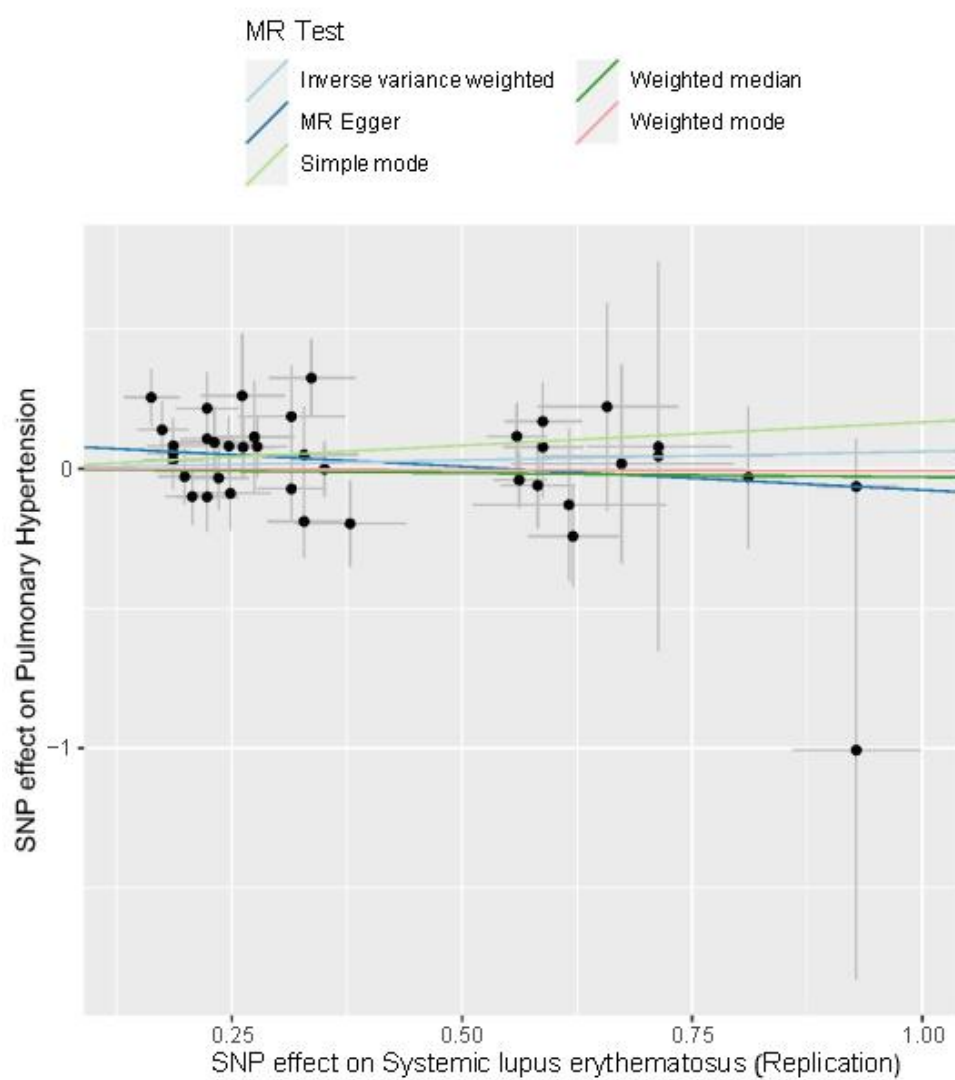

Supplement: Supplementary file 1 [file 0a643c7e245b9df6a94ef681.pdf]
